# Supplementary material for: Human milk and mucosa-associated disaccharides impact on cultured infant fecal microbiota
Source: PubMed Central journal article supplement (PMC7366668; doi:10.1038/s41598-020-68718-4), 2020-07-16
Supplement: 41598_2020_68718_MOESM1_ESM.pdf [file 41598_2020_68718_MOESM1_ESM.pdf]

**Human milk and mucosa-associated disaccharides impact on cultured infant  
fecal microbiota**

Antonio Rubio-del-Campo<sup>1</sup>, Cristina Alcántara<sup>1</sup>, María Carmen Collado<sup>1</sup>, Jesús  
Rodríguez-Díaz<sup>2,\*</sup> and María J. Yebra<sup>1,\*</sup>

<sup>1</sup>Laboratorio de Bacterias Lácticas y Probióticos, Departamento de Biotecnología de Alimentos, IATA-CSIC, Valencia, Spain. <sup>2</sup>Departamento de Microbiología, Facultad de Medicina, Universidad de Valencia, Valencia, Spain.

**Supplementary\_Table S1.** Primers used in this study

| <b>qPCR<br/>Target bacteria</b>          | <b>Name</b>    | <b>Sequence</b>            | <b>Reference</b>             |
|------------------------------------------|----------------|----------------------------|------------------------------|
| Total bacteria                           | pUniv1         | CGT GCC AGC AGC CGC GG     | Mira-Pascual et al., 2015    |
|                                          | pUniv2         | TGG ACT ACC AGG GTA TCT    |                              |
| <i>Bacteroides</i> group                 | Bac group F    | GAG AGG AAG GTC CCC CAC    | Echarri et al., 2011         |
|                                          | Bac group R    | CGC KAC TTG GCT GGT TCA G  |                              |
| <i>Bifidobacterium</i> genus             | Bifido5'       | GAT TCT GGC TCA GGA TGA    | Gueimonde et al., 2004       |
|                                          | Bifido3'       | CTG ATA GGA CGC GAC CCC    |                              |
| <i>Blautia coccoides</i> group           | g-Ccoc-F       | AAA TGA CGG TAC CTG ACT AA | Matsuki et al., 2002         |
|                                          | g-Ccoc-R       | CTT TGA GTT TCA TTC TTG    |                              |
| <i>Enterobacteriaceae</i><br>family      | EnterobactF    | CATTGACGTTACCCGCAGAAGA     | Bartosch et al., 2004        |
|                                          | EnterobactR    | CTCTACGAGACTCAAGCTTGC      |                              |
| <i>Lactobacillus</i> spp.                | LacF           | AGC AGT AGG GAA TCT TCC A  | Mira-Pascual et al.,<br>2015 |
|                                          | LacR           | CAC CGC TAC ACA TGG AG     |                              |
| <i>Bifidobacterium breve</i>             | Bbreve5'       | AAT GCC GGA TGC TCC ATC    | Gueimonde et al., 2007       |
|                                          | Bbreve3'       | GCC TTG CTC CCT AAC AAA    |                              |
| <i>Bifidobacterium bifidum</i>           | Bbifidum5'     | TGA CCG ACC TGC CCC ATG CT | Gueimonde et al., 2007       |
|                                          | Bbifidum3'     | CCC ATC CCA CGC CGA TAG    |                              |
| <i>Bifidobacterium catenulatum</i> group | Bcatenulatum5' | GCC GGA TGC TCC GAC TCC T  | Gueimonde et al., 2007       |
|                                          | Bcatenulatum3' | ACC CGA AGG CTT GCT CCC    |                              |
| <i>Bifidobacterium lactis</i>            | Anim-Lactis F  | TCACGACAAGTGGGTTGCCA       | Sheu et al., 2010            |
|                                          | Anim-Lactis R  | GTTGATCGGCAGCTTGCCG        |                              |
| <i>Bifidobacterium longum</i> group      | Blongum5'      | TTC CAG TTG ATC GCA TGG    | Gueimonde et al., 2007       |
|                                          | Blongum3'      | GGC TAC CCG TCG AAG CCA    |                              |
| <i>Lactobacillus acidophilus</i>         | LbAcF          | CTGCTGTTTCTTCAGCATCT       | Larsen et al., 2011          |
|                                          | LbAcR          | TCAGTATTGATACCACGTGAAT     |                              |
| <i>Lactobacillus casei</i> subgroup      | sg_Lcas-F      | ACC GCA TGG TTC TTG GC     | Matsuda et al., 2009         |
|                                          | sg_Lcas-R      | CCG ACA ACA GTT ACT CTG CC |                              |
| <i>Lactobacillus reuteri</i> subgroup    | sg-Lreu-F      | GAA CGC AYT GGC CCA A      | Matsuda et al., 2009         |
|                                          | sg-Lreu-R      | TCC ATT GTG GCC GAT CAG T  |                              |
|                                          | <b>Name</b>    | <b>Sequence</b>            | <b>Reference</b>             |
| RAPD-PCR                                 | MVC            | AGT CAG CCA C              | Tynkkynen et al., 1999       |
| 16S rRNA gene                            | 27F            | AGA GTT TGA TCC TGG CTC AG | Weisburg et al., 1991        |
|                                          | 924R           | CTTGTGCGGGCCCCCGTCAATTC    | Rudi et al., 1997            |
